# Supplementary material for: Light acclimation interacts with thylakoid ion transport to govern the dynamics of photosynthesis
Source: Research Square preprint supplement (doi:10.21203/rs.3.rs-948381/v1), 2021-09-29
Supplement: Supplementary file 1 [file 2e7d9f29616839b7f0e82d34.xlsx]

## Sheet: List of abbreviations
Abbrevition	Explanation
A	CO2 assimilation rate
Ag	Gross CO2 assimilation rate
An	Net CO2 assimilation rate
Ax	Antheraxanthin
CBB cycle	Calvin Bassham Benson cycle
Chl	Chlorophyll
Cyt b6f	Cytochrome b6f
DD	Dynamic day
DDF	Dynamic day with step-wise fluctuations
DDS	Dynamic sinusoidal day
DDSF	Dynamic sinusoidal day with random fluctuations
DEPS	De-epoxidation state
ECS	Electrochromic shift
F'	Fluorescence in the light
F0	Minimal fluorescence in the dark
FD	Flat day
FDH	Flat day high light
FDL	Flat day low light
FDM	Flat day medium light
FL	Fluctuating light
Fm	Maximum fluorescence in the dark
Fm''	Maximum fluorescence during dark relaxation
Fm'	Maximum fluorescence in the light
Fv/Fm	Maximum photosystem II quantum efficiency
gH+	ATP synthase conductivity
HI	High irradiance: 900 µmol photons m-2 s-1
iBAQ	Intensity-based absolute quantification
KEA3	K+ efflux antiporter 3
LHCII	Light harvesting complex II
LI	Low irradiance: 90 µmol photons m-2 s-1
LT	Light treated
ND	Natural day
NPQ	Non-photochemical quenching
NPQf	Fast relaxing NPQ, qE
NPQs	Slow relaxing NPQ
ON	Over-night
PAR	Photosynthetic active radiation
PFDmean	Average photon flux density
PFDvar	Photon flux density variations
pmf	Proton motif force
PSI	Photosystem I
PSII	Photosystem II
qE	Energy-dependent quenching
VAZ	Violaxanthin, antheraxanthin, zeaxanthin
VCCN1	Voltage-dependent Cl- channel
Vx	Violaxanthin
WT	Wild-type
Zx	Zeaxanthin
ΔNPQHI	NPQ difference between the last point of the 1st and 4th HI phase of the fluctuation
ΔNPQLI	NPQ difference between the last point of the 1st and 4th LI phase of the fluctuation
ΔpH	Difference in pH
ΔΨ	Membrane potential
ρ	Pearson Correlation coefficient rho
ΦPSII	Photosystem II quantum efficiency phi

## Sheet: Fig1a-b_SFig1 Climate data
Supplementary Tables
Supplemental Table_Fig1a-b_SFig1: Growth parameters of phytotron and polytunnel grown plants
Plants were grown under 8 different growth conditions (Fig. 1a-b).Three flat day (FD) conditions were applied: 90 (low, FDL), 250 (medium, FDM) or 900 µmol photons m-2 s-1 (high, FDH). Additionally, three dynamic day (DD) conditions were applied with varying light intensities over the day period: Fluctuating DD (DDF) had 144 repetitions of the same light fluctuation (4 min 90, 1 min 900 µmol phot…
Growth condition	Day in controlled climate phytotron						ND1: Day in polytunnel								For correlation: 3 d average prior to measurement			ND2: Day in polytunnel											For correlation: 3 d average prior to measurement
	FDL	FDM	FDH	DDS	DDF	DDSF	1	2	3	4	5	6	7	8	Light curve	Gas exchange	Fluctuating light	1	2	3	4	5	6	7	8	9	10	11	Light curve	Gas exchange	Fluctuating light	Thylakoid extraction for pigment and protein quantification
PFDmean [µmol photons m-2 s-2]	90	250	900	550	250	250	129.506	221.142	427.448	354.409	276.087	200.485	180.029	93.6132	218.867	218.867	276.994	480.287	183.122	473.517	517.771	488.956	517.482	418.835	259.638	108.813	221.634	150.285	398.652	475.091	398.652	196.695
PFDvar [µmol photons m-2 s-2]	0	0	0	1934	233460	94017	2626	7020	17958	34930	36796	20958	10428	4866	22727.3	22727.3	30894.7	23518	6180	12952	6994	6924	11576	48452	17552	2200	4720	7326	25860	22317.3	25860	8157.33
Daily light integral [mol photons m-2 s-1]	3.888	10.8	38.88	23.76	10.8	10.8	5.68014	9.8187	19.0556	16.1185	12.4073	9.06996	8.15532	4.24068	9.87754	9.87754	12.5319	23.1114	8.8338	23.0129	25.4122	24.086	25.5533	20.7323	12.6028	5.13162	10.9842	7.34892	19.6295	23.4572	19.6295	9.57288
D (Daily light integral -PFDmean*12 h) [mol photons m-2 s-1]	0	0	0	0	0	0	0.0854741	0.26537	0.589878	0.808052	0.480391	0.40899	0.378061	0.196588	0.422481	0.422481	0.565811	2.36301	0.922934	2.55699	3.0445	2.96307	3.19804	2.63866	1.38647	0.430899	1.40959	0.856623	2.40772	2.93326	2.40772	1.07565

## Sheet: Fig1c Statistical analysis
Supplementary Tables
Supplemental Table_Fig1c: Effects of PFDmean and PFDvar on ΦPSII at 700 µmol photons m-2 s-1
Analysis of covariance was performed by SAS using the average photon flux density (PFDmean) and the variations in photon flux density (PFDvar; calculated as sum of all light intensity changes over the day) as covariates for ΦPSII at 700 µmol photons m-2 s-1 of WT plants from 8 different growth conditions (FDL, FDM, FDH, DDS, DDF, DDSF, ND1, ND2; Supplemental Tables_Fig1a-b_SFig1). Significant eff…
Source	F	p	Source	Estimate	t	p
PFDvar	6.35	0.0152	Intercept	0.211012	29.33	<0.0001
PFDmean	103.73	<0.0001	PFDvar	-1.3073e-06	-2.01	0.0507
PFDvar x PFDmean	4.19	0.0462	PFDmean	0.000143509	9.96	<0.0001
			PFDvar x PFDmean	5.4e-09	2.05	0.0462

## Sheet: Fig1d_SFig2c Statistics
Supplementary Tables
Supplemental Table_Fig1d_SFig2c: Effects of PFDmean and PFDvar on CO2 assimilation
Analysis of covariance was performed by SAS using the average photon flux density (PFDmean) and the variations in photon flux density (PFDvar; calculated as sum of all light intensity changes over the day) as covariates for net CO2 assimilation (An) after 10 min at high light (HI; 900 µmol photons m-2 s-1) and10 min at low light (LI; 90 µmol photons m-2 s-1), as well as CO2 release after 5 min in…
Source	Parameter	F	p	Source	Parameter	Estimate	t	p
PFDvar	HI-An	5.996	0.01882	Intercept	HI-An	9.86634	17.81	<0.0001
	LI-An	3.444	0.07067		LI-An	2.96731	18.85	<0.0001
	Rd	8.192	0.0066		Rd	-0.845028	-5.15	<0.0001
	Ag	1.871	0.17902		Ag	10.703	16.67	<0.0001
PFDmean	HI-An	10.739	0.00217	PFDvar	HI-An	0.000116386	3	0.0046
	LI-An	79.789	<0.0001		LI-An	-2.5696e-05	-2.32	0.0255
	Rd	110.793	<0.0001		Rd	-4.02711e-05	-3.48	0.0012
	Ag	28.772	<0.0001		Ag	0.00015715	3.49	0.0012
PFDvar x PFDmean	HI-An	7.739	0.0082	PFDmean	HI-An	0.00547981	4.36	<0.0001
	LI-An	6.279	0.01628		LI-An	-0.00289636	-8.55	<0.0001
	Rd	14.243	0.00051		Rd	-0.00356646	-10.09	<0.0001
	Ag	11.425	0.00163		Ag	0.00908309	6.24	<0.0001
				PFDvar x PFDmean	HI-An	-4.32e-07	-2.78	0.0082
					LI-An	1.11e-07	2.51	0.0163
					Rd	1.748e-07	3.77	0.0005
					Ag	-6.1e-07	-3.38	0.0016

## Sheet: Fig1e-f Statistical analysis
Supplementary Tables
Supplemental Table_Fig1e-f: Effects of light treatments on the violaxanthin cycle
Analysis of covariance was performed by SAS using the average photon flux density (PFDmean) and the variations in photon flux densitiy (PFDvar; calculated as sum of all light intensity changes over the day) for the pigment composition of the violaxanthin cycle. Pigments were extracted from isolated thylakoid membranes of WT plants from 7 different growth conditions (FDL, FDM, FDH, DDS, DDF, DDSF,…
Source	Parameter	F	p	Source	Parameter	Estimate	t	p
PFDvar	DEPS	110.64	<0.0001	Intercept	DEPS	10.5841	5.34	<0.0001
	VAZ	32.68	<0.0001		VAZ	23.3274	16.05	<0.0001
PFDmean	DEPS	4.83	0.0378	PFDvar	DEPS	0.00103921	1.07	0.2955
	VAZ	1.5	0.2329		VAZ	0.0018425	2.59	0.0161
PFDvar x PFDmean	DEPS	0.88	0.3588	PFDmean	DEPS	0.00296772	0.7	0.4909
	VAZ	6.33	0.019		VAZ	0.0102585	3.3	0.003
				PFDvar x PFDmean	DEPS	-3.63e-06	-0.94	0.3588
					VAZ	-7.16e-06	-2.52	0.019

## Sheet: Fig1e-f_SFig4c Thy pigments
Supplementary Tables
Supplemental Table_Fig1e-f_SFig4c: Pigment content from isolated thylakoids
Pigments were extracted from isolated thylakoid membranes of WT plants from 7 different growth conditions (FDL, FDM, FDH, DDS, DDF, DDSF, ND2; Supplemental Tables_Fig1a-b_SFig1) and quantified as described in Färber et al. (1997)55. All values are given in mmol per mol Chl a+b, except for Chl a/b. Averages of n = 4 ± SD are shown. Different light-grey letters indicate a significant difference bet…
Growth condition	Chl a/b	Chl a	Chl b	β-Car	Vx	Ax	Zx	Lut	Nx
FDL	3.4 ± 0.0 a	770.8 ± 1.3 a	229.3 ± 1.3 e	64.0 ± 0.0 ab	19.3 ± 0.4 ab	1.0 ± 0.0 a	1.5 ± 0.5 a	88.0 ± 1.9 b	23.0 ± 0.7 c
FDM	3.5 ± 0.0 b	777.3 ± 1.6 b	222.8 ± 1.6 d	65.8 ± 1.5 b	19.8 ± 0.8 ab	1.0 ± 0.0 a	1.0 ± 0.0 a	83.5 ± 0.5 a	21.0 ± 0.7 ab
FDH	3.6 ± 0.0 cd	781.5 ± 2.1 cd	218.5 ± 2.1 bc	72.3 ± 0.8 c	25.3 ± 1.1 d	3.3 ± 0.4 b	2.0 ± 0.0 a	79.5 ± 1.1 a	23.3 ± 0.4 c
DDS	3.6 ± 0.0 de	784.0 ± 1.0 de	216.0 ± 1.0 ab	74.8 ± 0.8 cd	23.0 ± 0.0 c	2.5 ± 0.5 b	1.8 ± 0.4 a	84.8 ± 0.4 b	20.8 ± 0.4 ab
DDF	3.7 ± 0.0 e	786.5 ± 1.5 e	213.5 ± 1.5 a	65.3 ± 1.3 ab	18.0 ± 0.7 a	8.5 ± 0.9 c	9.0 ± 0.0 c	80.8 ± 2.3 a	22.3 ± 0.8 bc
DDSF	3.6 ± 0.0 cd	781.8 ± 1.3 cd	218.3 ± 1.3 bc	77.5 ± 1.5 d	20.75 ± 0.8 b	6.0 ± 0.0 c	9.5 ± 0.9 c	93.5 ± 0.5 b	22.75 ± 0.8 c
ND2	3.5 ± 0.0 c	778.8 ± 0.8 bc	221.3 ± 0.8 cd	62.8 ± 0.8 a	26.3 ± 1.3 d	3.0 ± 0.0 b	3.0 ± 0.0 b	81.3 ± 1.9 a	20.3 ± 0.4 a

## Sheet: Fig2c_SFig8 Statistics MRA
Supplementary Tables
Supplemental Table_Fig2c_SFig8: Effects of growth light factors on the kea3 and vccn1 NPQ phenotypes
Multiple regression analysis was performed using SigmaPlot on the NPQ ratio (Genotype/WT) by employing the average photon flux density (PFDmean) and the variations in photon flux density (PFDvar; calculated as sum of all light intensity changes over the day) as co-variates of WT, kea3 lines and vccn1 lines from 8 different growth conditions (FDL, FDM, FDH, DDS, DDF, DDSF, ND1, ND2; Supplemental T…
		kea3					vccn1
time point	Source	F	DF	t	p	Coefficient	F	DF	t	p	Coefficient
HI 30s	model	3.673	96		0.029		16.31	69		<0.001
	intercept			53.616	<0.001	1.125			45.112	<0.001	0.774
	PFDmean			2.43	0.017	0.0001			5.68	<0.001	0.000188
	PFDvar			1.924	0.057	2.36e-07			1.274	0.207	1.17e-07
HI 60s	model	26.324	93		<0.001		5.956	69		0.004
	intercept			56.001	<0.001	1.09			41.379	<0.001	0.855
	PFDmean			6.934	<0.001	0.000263			2.345	0.022	9.35e-05
	PFDvar			0.265	0.792	2.98e-08			-1.636	0.107	-1.81e-07
LI 20 s	model	5.336	96		0.006		2.105	69		0.13
	intercept			33.608	<0.001	1.703			24.581	<0.001	1.005
	PFDmean			-0.812	0.419	-8.11e-05			0.852	0.397	6.72e-05
	PFDvar			2.73	0.008	8.1e-07			-1.49	0.141	-3.26e-07
LI 60 s	model	30.538	96		<0.001		1.763	69		0.179
	intercept			29.285	<0.001	1.497			36.959	<0.001	1.018
	PFDmean			-0.951	0.344	-9.58e-05			0.806	0.423	4.28e-05
	PFDvar			7.031	<0.001	2.11e-06			-1.344	0.184	-1.98e-07
LI final	model	3.924	96		0.023		1.264	69		0.289
	intercept			36.687	<0.001	1.085			36.924	<0.001	1.031
	PFDmean			2.381	0.019	0.000139			-0.6	0.55	-3.24e-05
	PFDvar			2.168	0.033	3.75e-07			-1.587	0.117	-2.37e-07
5 min dark	model	2.903	96		0.06		3.243			0.045
	intercept			37.77	<0.001	1.019			34.365	<0.001	1.033
	PFDmean			0.47	0.64	2.5e-05			-1.464	0.148	-8.49e-05
	PFDvar			-2.084	0.04	-3.29e-07			-2.446	0.017	-3.93e-07

## Sheet: Fig3_SFig9 PhiII-NPQ Correl.
Supplementary Tables
Supplemental Table_Fig3_SFig9: Correlation analysis of ΦPSII versus NPQ across genotypes and conditions
A linear relationship between ΦPSII and NPQ was fitted to single replicate data points, with n=49-98 for genotypes (WT, kea3, vccn1) and n=18-34 for growth conditions (FDL, FDM, FDH, DDS, DDF, DDSF, ND1, ND2; Supplemental Tables_Fig1a-b_SFig1). NPQ and ΦPSII were determined during the third light fluctuation at 30 s and 60 s at high irradiance (HI; 900 µmol photons m-2 s-1) and 20 s and 60 s afte…
Genotype/ Condition	HI 30 s		HI 60 s		LI 20 s		LI 60 s
	Slope	ρ	Slope	ρ	Slope	ρ	Slope	ρ
all	-0.053	-0.50***	-0.091	-0.73***	-0.067	-0.90***	-0.071	-0.84***
WT	-0.091	-0.46*	-0.15	-0.81***	-0.101	-0.86***	-0.146	-0.92***
kea3	-0.06	-0.49***	-0.088	-0.72***	-0.063	-0.89***	-0.069	-0.84***
vccn1	-0.007	-0.05	-0.117	-0.59***	-0.081	-0.67***	-0.097	-0.63***
FDL	-0.014	-0.62*	-0.035	-0.73***	-0.066	-0.98***	-0.04	-0.84***
FDM	-0.032	-0.73***	-0.044	-0.81***	-0.071	-0.98***	-0.064	-0.96***
FDH	-0.079	-0.89***	-0.071	-0.88***	-0.053	-0.86***	-0.042	-0.64*
DDS	-0.04	-0.28	-0.07	-0.77***	-0.131	-0.74***	-0.197	-0.70***
DDF	-0.036	-0.89***	-0.044	-0.89***	-0.063	-0.97***	-0.059	-0.93***
DDSF	-0.035	-0.88***	-0.046	-0.92***	-0.064	-0.98***	-0.056	-0.96***
ND1	-0.009	-0.73*	-0.01	-0.65*	-0.055	-0.96***	-0.031	-0.94***
ND2	-0.013	-0.50*	-0.014	-0.53*	-0.034	-0.80*	-0.008	-0.12

## Sheet: Fig4 Pigments 
Supplementary Tables
Supplemental Table_Fig4: Leaf pigments
Whole rosettes of WT, kea3 and vccn1 were shock-frozen in liquid nitrogen in the middle of the light period of the respective light environment (6 h after light onset of FDL, FDH and DDF; Supplemental Tables_Fig1a-b_SFig1). Pigments were extracted from ground leaf powder and quantified as described in Färber et al. (1997)55. All values are given in mmol per g fresh weight, except for the Chl a/b …
Growth condition	Genotype	Chl a+b	Chl a/b	Lut	ß-Car
FDL	WT	1672 ± 125	3.64 ± 0.01	173 ± 12	130 ± 9
	kea3-1	1701 ± 71	3.62 ± 0.03	176 ± 9	131 ± 6
	kea3-2	1566 ± 136	3.66 ± 0.04	165 ± 16	123 ± 11
	vccn1-1	1427 ± 98	3.67 ± 0.02	148 ± 13	111 ± 8
	vccn1-2	1690 ± 157	3.61 ± 0.03	176 ± 15	131 ± 12
FDH	WT	1300 ± 77	3.64 ± 0.02	149 ± 10	120 ± 8
	kea3-1	1533 ± 100	3.64 ± 0.02	171 ± 14	143 ± 10
	kea3-2	1344 ± 95	3.57 ± 0.03	151 ± 8	123 ± 9
	vccn1-1	1238 ± 106	3.62 ± 0.02	142 ± 10	114 ± 9
	vccn1-2	1308 ± 146	3.65 ± 0.02	146 ± 15	121 ± 13
DDF	WT	1180 ± 81	3.94 ± 0.07	127 ± 9	101 ± 7
	kea3-1	1345 ± 131	3.83 ± 0.04	150 ± 16	114 ± 13
	kea3-2	1161 ± 90	3.80 ± 0.02	128 ± 9	98 ± 8
	vccn1-1	1001 ± 66	3.92 ± 0.00	107 ± 8	84 ± 5
	vccn1-2	1139 ± 96	3.92 ± 0.02	123 ± 11	96 ± 8

## Sheet: Fig4c
Supplementary Tables
Supplemental Table_Fig4c: Normalized extinction coefficients for ECS, qE, Zx and drift.
The normalized, effective extinction coefficients for ECS were determined by measuring absorbance changes following a 1 ms subsaturating light pulse and a subsequent 10 ms dark relaxation phase, which at this time scale predominantly reflect the ECS signal45,46. Relative extinction coefficients for the qE and Zx-related signals were approximated using the approach of Bilger et al., 198947. The sp…
Wavelength:	475 nm	488 nm	505 nm	520 nm	535 nm	545 nm
ECS	-0.75	-0.38	0.31	1	0.37	-0.17
qE	0	-0.1	-0.04	0.56	1	0.62
Zx	0.05	0.15	1	0.4	0.11	0.02
Drift	1	0.55	0.23	0.09	0.06	0.05

[truncated: 13 more sheets: Fig4d-f qE traces, Fig4g-l ECS traces, SFig2a-b Statistical analysis, SFig3_SFig4b WB quantification, SFig4b_1 Proteomics data, SFig4b_2 Statistics Westernblot, SFig4b_3 Statistics Proteomics, SFig4c Statistic pigments, SFig5a ANOVA_Tukey, SFig8 Correlation analysis, SFig11 NPQ-PhiII Correlations, SFig14 Anti-KEA3 WB, SFig16h-k ANOVA_Tukey  ]
